# Supplementary material for: Association between Pre-Pregnancy Overweightness/Obesity and Pregnancy Outcomes in Women with Polycystic Ovary Syndrome: A Systematic Review and Meta-Analysis
Source: MDPI journal article supplement (doi:10.3390/ijerph19159094), 2022-07-26
Supplement: s1 [file s1]

**Table S1.** Use MeSH term and Emtree combined with Boolean operators.

|                                                                                                                                                                                                                                                                                                                                                                                                                                                                                                                                    |
|------------------------------------------------------------------------------------------------------------------------------------------------------------------------------------------------------------------------------------------------------------------------------------------------------------------------------------------------------------------------------------------------------------------------------------------------------------------------------------------------------------------------------------|
| <b>PubMed</b>                                                                                                                                                                                                                                                                                                                                                                                                                                                                                                                      |
| (Polycystic ovary syndrome) AND (Obesity, Maternal OR Obesity in Pregnancy OR Overweight OR Body Mass Index) AND (Miscarriage OR Spontaneous Abortion OR Fetal Demise OR Fetal Deaths OR Pregnancy-Induced Diabetes OR Gestational Diabetes Mellitus OR Pregnancy-induced hypertension OR Gestational Hypertension OR Pregnancy Transient Hypertension OR Preeclampsia OR Eclampsia OR Cesarean Sections OR Preterm Birth OR Premature Births OR Fetal Macrosomias OR Intrauterine Growth Restriction OR Fetal Growth Restriction) |
| <b>EMBASE</b>                                                                                                                                                                                                                                                                                                                                                                                                                                                                                                                      |
| (Polycystic ovary syndrome) AND (Maternal obesity OR body mass) AND (Spontaneous Abortion OR Fetal death OR Pregnancy diabetes mellitus OR Maternal hypertension OR Preeclampsia OR Eclampsia OR Cesarean Section OR Immature and premature labor OR Macrosomia OR Intrauterine Growth Retardation)                                                                                                                                                                                                                                |
| <b>Web of science</b>                                                                                                                                                                                                                                                                                                                                                                                                                                                                                                              |
| (Polycystic ovary syndrome) AND (Maternal obesity OR body mass) AND (Spontaneous Abortion OR Fetal death OR Pregnancy diabetes mellitus OR Maternal hypertension OR Preeclampsia OR Eclampsia OR Cesarean Section OR Immature and premature labor OR Macrosomia OR Intrauterine Growth Retardation)                                                                                                                                                                                                                                |
| <b>Cochrane database</b>                                                                                                                                                                                                                                                                                                                                                                                                                                                                                                           |
| (Polycystic ovary syndrome) AND (Maternal obesity OR body mass) AND (Spontaneous Abortion OR Fetal death OR Pregnancy diabetes mellitus OR Maternal hypertension OR Preeclampsia OR Eclampsia OR Cesarean Section OR Immature and premature labor OR Macrosomia OR Intrauterine Growth Retardation)                                                                                                                                                                                                                                |

**Table S2.** Causes of infertility in the included studies.

| <b>Study [reference]</b>      | <b>Causes of infertility</b>                                                                                                                                                               |
|-------------------------------|--------------------------------------------------------------------------------------------------------------------------------------------------------------------------------------------|
| Hamilton-Fairley et al. [40]. | PCOS + Exclude tubal factor, male factor                                                                                                                                                   |
| McCormick et al. [15].        | PCOS + Exclude tubal factor, uterine factor                                                                                                                                                |
| Ozgun et al. [19].            | PCOS + Exclude infertility cause other than PCOS                                                                                                                                           |
| Shalom-Paz et al. [13].       | PCOS + Exclude oocyte cryopreservation and donation.                                                                                                                                       |
| De Frène et al. [34].         | PCOS + Exclude systemic disease imitate PCOS                                                                                                                                               |
| Huang et al. [21].            | PCOS + Exclude male factor, oocyte donation, endometriosis, metabolic disease                                                                                                              |
| Bailey et al. [35].           | PCOS + Exclude thyroid disease, prior chemotherapy and radiotherapy, uterine factor, chromosome factor, endometriosis, pelvic adhesion, pelvic inflammation, adenomyosis, submucosal myoma |
| Cui et al. [20].              | PCOS only                                                                                                                                                                                  |
| Sheng et al. [12].            | PCOS + Exclude systemic disease                                                                                                                                                            |
| Pan et al. [14].              | PCOS + Exclude male factor, oocyte donation, endometriosis                                                                                                                                 |
| Yang et al. [36].             | PCOS + Exclude tubal factor, male factor, endometriosis, previous ovarian surgical history, systemic disease                                                                               |
| Chen et al. [39].             | PCOS + Exclude systemic disease imitate PCOS                                                                                                                                               |
| Lin et al. [16].              | PCOS only (26.6%), PCOS + male factor (12.1%), PCOS + tubal factor (50.2%), PCOS + male factor + tubal factor (7.3%), PCOS + other factor (3.8%)                                           |
| Qiu et al. [18].              | PCOS + Exclude gynecological cancer, systemic disease, chromosomal factor, uterine factor                                                                                                  |
| Zhou et al. [17].             | PCOS + Exclude tubal factor, uterine factor, endometriosis, previous uterine and ovary surgery, systemic disease                                                                           |
| Guan et al. [38].             | PCOS + Exclude tubal factor, male factor, pelvic inflammation, endometriosis                                                                                                               |
