# Supplementary material
Source: MDPI journal article supplement (https://www.mdpi.com/1660-4601/19/15/9094)
Supplement: s1 [file s1]

Archive with 1 entries (1 files):
- ijerph-1812324-Supplementary .pdf
